# Supplementary material for: Application and Validation of Activity Monitors’ Epoch Lengths and Placement Sites for Physical Activity Assessment in Exergaming
Source: PubMed Central journal article supplement (PMC6162850; doi:10.3390/jcm7090268), 2018-09-11

# Supplementary materials: Application and Validation of Activity Monitors' Epoch Lengths and Placement Sites for Physical Activity Assessment in Exergaming

**Table S1.** Time spent on sedentary and physical activity intensity levels in epochs.

|               |                | wGT3X Hip   |      |      |      |      |      | GT9X Hip   |      |      |      |      |      |
|---------------|----------------|-------------|------|------|------|------|------|------------|------|------|------|------|------|
|               |                | 1           | 5    | 10   | 15   | 30   | 60   | 1          | 5    | 10   | 15   | 30   | 60   |
| Troiano       | Sedentary, min | 6.6         | 2.1  | 1.1  | 0.8  | 0.4  | 0.2  | 6.9        | 2.5  | 1.3  | 0.9  | 0.5  | 0.3  |
|               |                | ±4.5        | ±3.5 | ±2.7 | ±2.6 | ±1.9 | ±1.3 | ±4.7       | ±3.8 | ±3.1 | ±2.8 | ±2.1 | ±1.6 |
|               | Light, min     | 9.4         | 13.0 | 13.6 | 13.8 | 13.7 | 13.6 | 9.3        | 13.1 | 13.8 | 14.2 | 14.2 | 14.0 |
|               |                | ±3.1        | ±4.7 | ±5.7 | ±6.2 | ±7.0 | ±7.5 | ±3.1       | ±4.9 | ±5.8 | ±6.5 | ±7.1 | ±8.2 |
| Moderate, min |                | 9.3         | 11.0 | 11.9 | 12.3 | 13.3 | 14.4 | 8.9        | 10.3 | 11.4 | 11.6 | 12.6 | 13.7 |
|               |                | ±3.5        | ±4.6 | ±5.1 | ±5.4 | ±5.9 | ±6.7 | ±3.2       | ±4.2 | ±4.9 | ±5.2 | ±6.0 | ±7.2 |
| Vigorous, min |                | 4.7         | 3.9  | 3.4  | 3.1  | 2.6  | 1.8  | 4.9        | 4.1  | 3.6  | 3.3  | 2.7  | 2.0  |
|               |                | ±3.3        | ±3.3 | ±3.2 | ±3.3 | ±3.1 | ±2.8 | ±3.2       | ±3.3 | ±3.3 | ±3.2 | ±3.2 | ±2.9 |
| Sasaki        | Sedentary, min | 7.0         | 2.7  | 1.6  | 1.2  | 0.6  | 0.3  | 7.4        | 3.1  | 1.9  | 1.4  | 0.7  | 0.5  |
|               |                | ±4.6        | ±3.9 | ±3.3 | ±2.9 | ±2.5 | ±1.6 | ±4.8       | ±4.2 | ±3.8 | ±3.4 | ±2.8 | ±2.3 |
|               | Light, min     | 11.2        | 15.1 | 16.2 | 16.5 | 17.1 | 17.9 | 10.9       | 15.0 | 16.2 | 16.7 | 17.4 | 17.9 |
|               |                | ±3.2        | ±4.6 | ±5.2 | ±5.6 | ±6.5 | ±7.0 | ±3.3       | ±4.9 | ±5.4 | ±6.0 | ±6.8 | ±7.5 |
| Moderate, min |                | 7.3         | 8.5  | 9.0  | 9.4  | 9.9  | 10.1 | 7.0        | 8.1  | 8.6  | 9.0  | 9.4  | 9.8  |
|               |                | ±3.0        | ±3.9 | ±4.3 | ±4.7 | ±5.2 | ±5.9 | ±2.9       | ±3.9 | ±4.3 | ±4.7 | ±5.5 | ±6.5 |
| Vigorous, min |                | 4.5         | 3.6  | 3.2  | 2.9  | 2.4  | 1.6  | 4.7        | 3.8  | 3.3  | 3.0  | 2.4  | 1.8  |
|               |                | ±3.1        | ±3.2 | ±3.1 | ±3.1 | ±2.9 | ±2.7 | ±3.1       | ±3.1 | ±3.1 | ±3.1 | ±3.0 | ±2.8 |
|               |                | wGT3X Wrist |      |      |      |      |      | GT9X Wrist |      |      |      |      |      |
|               |                | 1           | 5    | 10   | 15   | 30   | 60   | 1          | 5    | 10   | 15   | 30   | 60   |
| Troiano       | Sedentary, min | 0.4         | 0.2  | 0.1  | 0.1  | 0.0  | 0.0  | 0.4        | 0.2  | 0.1  | 0.1  | 0.0  | 0.0  |
|               |                | ±1.8        | ±1.2 | ±0.9 | ±0.7 | ±0.0 | ±0.0 | ±1.7       | ±1.1 | ±0.7 | ±0.5 | ±0.0 | ±0.0 |
|               | Light, min     | 1.2         | 0.5  | 0.3  | 0.3  | 0.3  | 0.2  | 1.2        | 0.6  | 0.3  | 0.4  | 0.4  | 0.2  |
|               |                | ±1.5        | ±1.2 | ±1.1 | ±1.1 | ±1.3 | ±1.2 | ±1.8       | ±1.3 | ±1.1 | ±1.2 | ±1.4 | ±0.9 |
| Moderate, min |                | 26.9        | 28.3 | 28.5 | 28.6 | 28.6 | 28.7 | 27.9       | 28.8 | 29.1 | 29.0 | 29.1 | 29.2 |
|               |                | ±6.5        | ±5.4 | ±5.3 | ±5.2 | ±5.3 | ±5.2 | ±4.4       | ±3.9 | ±3.7 | ±3.8 | ±3.8 | ±4.0 |
| Vigorous, min |                | 1.6         | 1.0  | 1.0  | 1.0  | 1.1  | 1.1  | 0.5        | 0.5  | 0.5  | 0.5  | 0.5  | 0.6  |
|               |                | ±6.1        | ±4.9 | ±5.0 | ±5.0 | ±5.1 | ±5.1 | ±3.5       | ±3.5 | ±3.5 | ±3.5 | ±3.6 | ±3.9 |
| Sasaki        | Sedentary, min | 0.4         | 0.2  | 0.1  | 0.1  | 0.0  | 0.0  | 0.4        | 0.2  | 0.1  | 0.1  | 0.0  | 0.0  |
|               |                | ±1.8        | ±1.2 | ±0.9 | ±0.7 | ±0.1 | ±0.0 | ±1.7       | ±1.1 | ±0.8 | ±0.6 | ±0.0 | ±0.0 |
|               | Light, min     | 2.8         | 1.3  | 0.9  | 0.8  | 0.8  | 0.6  | 2.9        | 1.3  | 1.0  | 0.8  | 0.8  | 0.9  |
|               |                | ±2.4        | ±1.9 | ±1.8 | ±1.8 | ±2.1 | ±2.2 | ±2.5       | ±2.2 | ±1.9 | ±1.9 | ±1.9 | ±2.0 |
| Moderate, min |                | 25.3        | 27.5 | 27.9 | 28.0 | 28.2 | 28.3 | 26.2       | 28.0 | 28.4 | 28.6 | 28.7 | 28.6 |
|               |                | ±6.5        | ±5.6 | ±5.5 | ±5.5 | ±5.6 | ±5.5 | ±4.6       | ±4.3 | ±4.0 | ±4.1 | ±4.0 | ±4.2 |
| Vigorous, min |                | 1.5         | 1.0  | 1.0  | 1.0  | 1.1  | 1.1  | 0.5        | 0.5  | 0.5  | 0.5  | 0.5  | 0.6  |
|               |                | ±6.0        | ±4.9 | ±5.0 | ±5.0 | ±5.1 | ±5.1 | ±3.4       | ±3.5 | ±3.5 | ±3.5 | ±3.6 | ±3.8 |

**Table S2.** Sedentary and physical activity levels between heart rate and activity counts in epochs with two activity cut-point sets.

|         |    | Hip       |        |       |        |          |        |          |        | Wrist     |        |       |        |          |        |          |        |
|---------|----|-----------|--------|-------|--------|----------|--------|----------|--------|-----------|--------|-------|--------|----------|--------|----------|--------|
| Epoch   |    | Sedentary |        | Light |        | Moderate |        | Vigorous |        | Sedentary |        | Light |        | Moderate |        | Vigorous |        |
| HR      |    | 7.0       | ±5.6   | 4.6   | ±3.4   | 9.1      | ±4.7   | 6.8      | ±6.3   | 7.0       | ±5.6   | 4.6   | ±3.4   | 9.11     | ±4.7   | 6.8      | ±6.3   |
| Sasaki  | 1  | 6.1       | ±3.7 † | 11.0  | ±3.3 * | 7.7      | ±2.3 † | 5.2      | ±2.8 † | 0.3       | ±1.7 * | 2.3   | ±2.0 * | 26.2     | ±5.1 * | 2.3      | ±8.9 * |
|         | 5  | 2.1       | ±3.1 * | 14.7  | ±4.7 * | 9.0      | ±3.2 † | 4.3      | ±3.0 * | 0.2       | ±1.3 * | 0.9   | ±1.5 * | 28.0     | ±4.8 * | 1.8      | ±8.2 * |
|         | 10 | 1.0       | ±2.7 * | 15.6  | ±5.0 * | 9.7      | ±3.5 † | 3.7      | ±3.0 * | 0.1       | ±0.9 * | 0.7   | ±1.5 * | 28.3     | ±4.6 * | 1.8      | ±8.2 * |
|         | 15 | 0.7       | ±2.4 * | 15.8  | ±5.4 * | 10.1     | ±3.9 † | 3.4      | ±3.0 * | 0.1       | ±0.7 * | 0.6   | ±1.6 * | 28.4     | ±4.7 * | 1.8      | ±8.3 * |
|         | 30 | 0.4       | ±2.0 * | 16.1  | ±5.9 * | 10.7     | ±4.6 † | 2.8      | ±2.9 * | 0.0       | ±0.0 * | 0.6   | ±1.9 * | 28.5     | ±4.7 * | 1.8      | ±8.6 * |
|         | 60 | 0.2       | ±1.5 * | 16.6  | ±6.6 * | 11.1     | ±5.6 † | 2.0      | ±2.8 * | 0.0       | ±0.0 * | 0.6   | ±2.0 * | 28.5     | ±4.8 * | 1.9      | ±8.8 * |
| Troiano | 1  | 5.7       | ±3.6 † | 9.1   | ±3.2 * | 9.8      | ±2.5 † | 5.4      | ±2.9 † | 0.3       | ±1.7 * | 0.8   | ±1.2 * | 27.7     | ±5.0 * | 2.4      | ±8.9 * |
|         | 5  | 1.5       | ±3.0 * | 12.4  | ±4.6 * | 11.5     | ±3.5 * | 4.5      | ±3.1 * | 0.2       | ±1.2 * | 0.3   | ±0.8 * | 28.6     | ±4.5 * | 1.8      | ±8.3 * |
|         | 10 | 0.7       | ±2.4 * | 12.7  | ±5.2 * | 12.6     | ±3.9 * | 4.0      | ±3.1 * | 0.1       | ±0.8 * | 0.2   | ±0.9 * | 28.7     | ±4.4 * | 1.8      | ±8.3 * |
|         | 15 | 0.5       | ±2.3 * | 12.8  | ±5.5 * | 13.0     | ±4.2 * | 3.7      | ±3.2 * | 0.1       | ±0.7 * | 0.3   | ±0.9 * | 28.8     | ±4.4 * | 1.8      | ±8.3 * |
|         | 30 | 0.3       | ±1.9 * | 12.5  | ±6.0 * | 14.1     | ±4.9 * | 3.1      | ±3.1 * | 0.0       | ±0.0 * | 0.3   | ±1.3 * | 28.8     | ±4.5 * | 1.8      | ±8.6 * |
|         | 60 | 0.2       | ±1.4 * | 12.2  | ±6.8 * | 15.4     | ±6.0 * | 2.2      | ±2.9 * | 0.0       | ±0.0 * | 0.2   | ±1.0 * | 28.8     | ±4.5 * | 1.9      | ±8.9 * |

† indicates a non-significant difference ( $P > 0.05$ ) between an epoch and the HR, whereas \* denotes a significant difference ( $P < 0.001$ ) between an epoch with the HR.

**Table S3.** Sedentary and physical activity levels between heart rate and activity counts in epochs with two activity cut-point sets and two activity monitors.

|         |       |    | Hip       |        |       |        |          |        |          |        | Wrist     |        |       |        |          |        |          |        |
|---------|-------|----|-----------|--------|-------|--------|----------|--------|----------|--------|-----------|--------|-------|--------|----------|--------|----------|--------|
| Epoch   |       |    | Sedentary |        | Light |        | Moderate |        | Vigorous |        | Sedentary |        | Light |        | Moderate |        | Vigorous |        |
| HR      |       |    | 7.0       | ±5.6   | 4.6   | ±3.4   | 9.1      | ±4.7   | 6.8      | ±6.3   | 7.0       | ±5.6   | 4.6   | ±3.4   | 9.11     | ±4.7   | 6.8      | ±6.3   |
| Sasaki  | wGT3X | 1  | 5.8       | ±3.6 † | 11.2  | ±3.4 * | 8.0      | ±2.5 † | 5.0      | ±3.1 * | 0.3       | ±1.8 * | 2.3   | ±2.2 * | 25.6     | ±6.8 * | 1.8      | ±6.4 * |
|         |       | 5  | 1.8       | ±3.0 * | 14.8  | ±4.6 * | 9.4      | ±3.4 † | 4.0      | ±3.2 * | 0.2       | ±1.3 * | 1.0   | ±1.7 * | 27.7     | ±5.9 * | 1.2      | ±5.3 * |
|         |       | 10 | 0.9       | ±2.5 * | 15.6  | ±5.0 * | 10.0     | ±3.7 † | 3.5      | ±3.1 * | 0.2       | ±1.0 * | 0.8   | ±1.6 * | 27.9     | ±5.8 * | 1.2      | ±5.3 * |
|         |       | 15 | 0.6       | ±2.4 * | 15.7  | ±5.3 * | 10.4     | ±4.0 † | 3.2      | ±3.2 * | 0.1       | ±0.8 * | 0.7   | ±1.7 * | 28.0     | ±5.8 * | 1.2      | ±5.3 * |
|         |       | 30 | 0.4       | ±2.1 * | 16.0  | ±5.9 * | 11.0     | ±4.6 * | 2.7      | ±3.0 * | 0.0       | ±0.1 * | 0.7   | ±2.1 * | 28.1     | ±5.9 * | 1.2      | ±5.4 * |
|         |       | 60 | 0.2       | ±1.6 * | 16.6  | ±6.5 * | 11.3     | ±5.4 * | 1.9      | ±2.9 * | 0.0       | ±0.0 * | 0.5   | ±2.2 * | 28.32    | ±5.9 * | 1.2      | ±5.5 * |
| Troiano | wGT3X | 1  | 6.2       | ±3.9 † | 10.9  | ±3.4 * | 7.6      | ±2.5 † | 5.3      | ±2.9 † | 0.3       | ±1.7 * | 2.3   | ±2.0 * | 26.8     | ±4.6 * | 0.6      | ±3.7 * |
|         |       | 5  | 2.2       | ±3.3 * | 14.6  | ±4.8 * | 8.9      | ±3.4 † | 4.3      | ±3.1 * | 0.2       | ±1.2 * | 0.8   | ±1.7 * | 28.4     | ±4.4 * | 0.6      | ±3.7 * |
|         |       | 10 | 1.1       | ±2.8 * | 15.6  | ±5.1 * | 9.6      | ±3.7 † | 3.7      | ±3.1 * | 0.1       | ±0.8 * | 0.7   | ±1.7 * | 28.6     | ±4.2 * | 0.6      | ±3.7 * |
|         |       | 15 | 0.8       | ±2.5 * | 15.8  | ±5.6 * | 9.9      | ±4.1 † | 3.4      | ±3.2 * | 0.1       | ±0.7 * | 0.6   | ±1.7 * | 28.8     | ±4.3 * | 0.6      | ±3.8 * |
|         |       | 30 | 0.4       | ±2.0 * | 16.2  | ±6.1 * | 10.6     | ±4.9 † | 2.8      | ±3.1 * | 0.0       | ±0.0 * | 0.6   | ±1.8 * | 28.8     | ±4.2 * | 0.6      | ±3.9 * |
|         |       | 60 | 0.2       | ±1.4 * | 16.6  | ±7.0 * | 11.1     | ±6.0 † | 2.1      | ±2.9 * | 0.0       | ±0.0 * | 0.7   | ±2.0 * | 28.7     | ±4.4 * | 0.6      | ±4.1 * |

|      |    |     |        |      |        |      |        |     |        |     |        |     |        |      |        |     |        |
|------|----|-----|--------|------|--------|------|--------|-----|--------|-----|--------|-----|--------|------|--------|-----|--------|
|      | 5  | 1.3 | ±2.8 * | 12.4 | ±4.6 * | 12.0 | ±3.9 * | 4.3 | ±3.3 * | 0.2 | ±1.3 * | 0.3 | ±0.8 * | 28.3 | ±5.7 * | 1.2 | ±5.3 * |
|      | 10 | 0.6 | ±2.2 * | 12.6 | ±5.2 * | 13.0 | ±4.3 * | 3.8 | ±3.3 * | 0.1 | ±0.9 * | 0.2 | ±0.9 * | 28.4 | ±5.6 * | 1.2 | ±5.4 * |
|      | 15 | 0.4 | ±2.2 * | 12.6 | ±5.5 * | 13.5 | ±4.5 * | 3.4 | ±3.4 * | 0.1 | ±0.8 * | 0.2 | ±0.9 * | 28.5 | ±5.5 * | 1.2 | ±5.3 * |
|      | 30 | 0.3 | ±1.9 * | 12.2 | ±6.0 * | 14.5 | ±5.1 * | 3.0 | ±3.2 * | 0.0 | ±0.0 * | 0.3 | ±1.3 * | 28.5 | ±5.7 * | 1.2 | ±5.4 * |
|      | 60 | 0.2 | ±1.4 * | 12.0 | ±6.5 * | 15.7 | ±5.9 * | 2.0 | ±2.9 * | 0.0 | ±0.0 * | 0.2 | ±1.2 * | 28.6 | ±5.5 * | 1.2 | ±5.5 * |
| GT9X | 1  | 5.9 | ±3.8 † | 9.0  | ±3.2 * | 9.6  | ±2.7 † | 5.5 | ±3.0 † | 0.3 | ±1.7 * | 0.8 | ±1.3 * | 28.3 | ±4.4 * | 0.6 | ±3.7 * |
|      | 5  | 1.7 | ±3.1 * | 12.4 | ±4.7 * | 11.3 | ±3.5 * | 4.6 | ±3.2 * | 0.2 | ±1.1 * | 0.3 | ±1.0 * | 28.9 | ±4.1 * | 0.6 | ±3.8 * |
|      | 10 | 0.8 | ±2.5 * | 12.8 | ±5.3 * | 12.4 | ±4.1 * | 4.0 | ±3.3 * | 0.1 | ±0.7 * | 0.3 | ±1.0 * | 29.0 | ±4.0 * | 0.6 | ±3.7 * |
|      | 15 | 0.6 | ±2.3 * | 13.0 | ±5.8 * | 12.8 | ±4.4 * | 3.7 | ±3.2 * | 0.1 | ±0.6 * | 0.3 | ±1.1 * | 29.0 | ±4.0 * | 0.6 | ±3.8 * |
|      | 30 | 0.3 | ±1.8 * | 12.7 | ±6.3 * | 13.9 | ±5.2 * | 3.1 | ±3.3 * | 0.0 | ±0.0 * | 0.4 | ±1.4 * | 29.0 | ±4.1 * | 0.6 | ±3.9 * |
|      | 60 | 0.2 | ±1.4 * | 12.3 | ±7.3 * | 15.2 | ±6.4 * | 2.3 | ±3.0 * | 0.0 | ±0.0 * | 0.2 | ±0.9 * | 29.1 | ±4.3 * | 0.7 | ±4.2 * |

† indicates a non-significant difference ( $P > 0.05$ ) between an epoch and the HR. Whereas \* denotes a significant difference ( $P < 0.001$ ) between an epoch with the HR.

**Figure S1.** Orientation of GT9X and wGT3X.

ActiGraph Link device orientation (Serial numbers starting with TAS)  
 Last Updated: Jul 26, 2016 05:54PM CDT

This FAQ outlines the axis orientation for ActiGraph Link (GT9X) activity monitor (Serial number starting with TAS). Axes are referred to in both the AGD epoch-level files as well as the raw \*.gt3x data exports. Expected static acceleration in g's is given for each device orientation with respect to gravity.

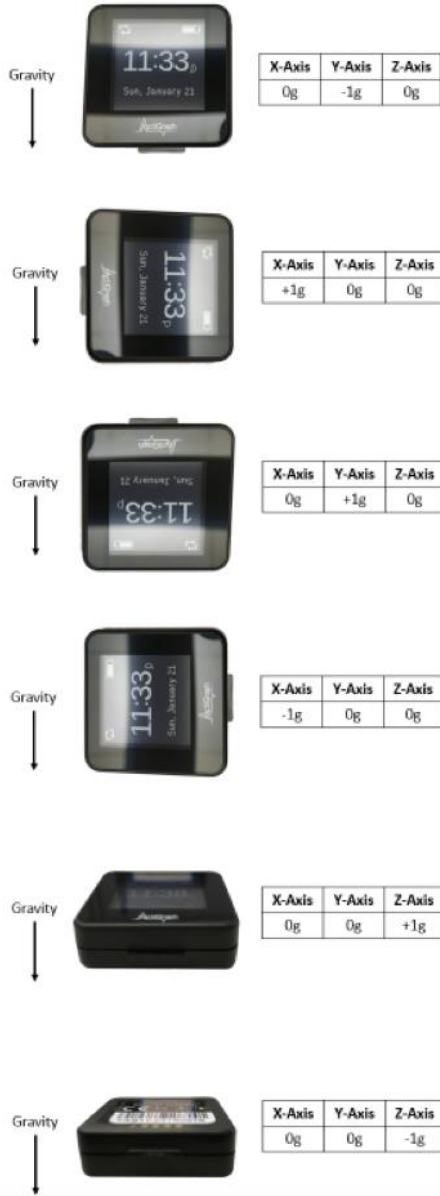

wGT3X-BT device orientation (Serial Numbers Starting with MOS2)  
 Last Updated: Jul 26, 2016 05:54PM CDT

This FAQ outlines the axis orientation for the wGT3X-BT activity monitor (Serial number starting with MOS2). Axes are referred to in both the AGD epoch-level files as well as the raw \*.gt3x data exports. Expected static acceleration in g's is given for each device orientation with respect to gravity.

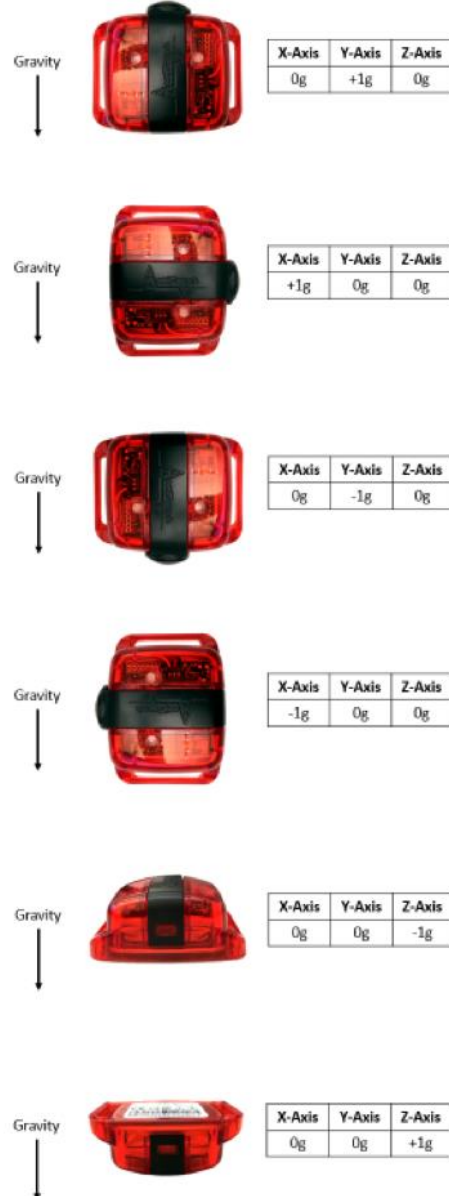

Supplement: jcm-07-00268-s001.pdf [file jcm-07-00268-s001.pdf]
